# Supplementary material for: Sulfur, phosphorus and iron codoped nickel oxide as an efficient catalyst for the oxygen evolution reaction
Source: Royal Society of Chemistry journal article supplement (doi:10.1039/d4qi01445f), 2024-01-01
Supplement: d4qi01445f1.pdf [file d4qi01445f1.pdf]

*Supporting Information for*

**Sulfur, phosphorus and iron codoped nickel oxide as efficient catalyst for oxygen evolution reaction**

Zhanqiang Hu,<sup>‡</sup> Songsong Zhi,<sup>‡</sup> Chen Chen,<sup>\*</sup> Jiuli Chang, Dapeng Wu, Kai Jiang,<sup>\*</sup> and Zhiyong Gao<sup>\*</sup>

<sup>†</sup> Key Laboratory of Yellow River and Huai River Water Environment and Pollution Control, Key Laboratory of Green Chemical Media and Reactions, Ministry of Education, Collaborative Innovation Center of Henan Province for Green Manufacturing of Fine Chemicals, School of Environment, School of Chemistry and Chemical Engineering, Henan Normal University, Henan Xinxiang 453007, P.R. China

Emails: chenchen2021@htu.edu.cn (C. Chen);

kjiang512@163.com (K. Jiang);

zygao512@163.com (Z. Gao)

<sup>‡</sup> These authors contributed equally

## Part I

The detailed position coordinates of the optimized structure of S,P-NiO(Fe)/CC in form of fractional coordinates.

S,P-NiO(Fe)/CC

1.0

|              |              |               |
|--------------|--------------|---------------|
| 8.9447965622 | 0.0000000000 | 0.0000000000  |
| 0.0000000000 | 8.9447965622 | 0.0000000000  |
| 0.0000000000 | 0.0000000000 | 18.3249282837 |

O P S Fe Ni

33 2 1 1 35

Direct

|             |             |             |
|-------------|-------------|-------------|
| 0.334059000 | 0.000038000 | 0.026110999 |
| 0.998816013 | 0.332670003 | 0.246610999 |
| 0.169551998 | 0.165876999 | 0.139504999 |
| 0.155638993 | 0.142157003 | 0.364196986 |
| 0.669275999 | 0.996227026 | 0.026393000 |
| 0.338248998 | 0.334654003 | 0.242799997 |
| 0.502976000 | 0.164605007 | 0.139203995 |
| 0.998696983 | 0.995806992 | 0.025504000 |
| 0.670969009 | 0.336041987 | 0.240618005 |
| 0.839899004 | 0.162696004 | 0.138827994 |
| 0.852518976 | 0.149902001 | 0.366712004 |
| 0.333476990 | 0.331034005 | 0.026303001 |
| 0.995151997 | 0.662419975 | 0.243395001 |
| 0.172172993 | 0.500586987 | 0.138786003 |
| 0.165821001 | 0.510258019 | 0.368901998 |
| 0.663815022 | 0.331261992 | 0.024394000 |
| 0.325046986 | 0.676060975 | 0.249640003 |
| 0.503292978 | 0.500248015 | 0.138358995 |
| 0.998392999 | 0.331735998 | 0.026699999 |
| 0.664466023 | 0.664273977 | 0.241693005 |

|             |             |             |
|-------------|-------------|-------------|
| 0.841261029 | 0.503261983 | 0.139090002 |
| 0.334500015 | 0.664550006 | 0.025796000 |
| 0.001333000 | 0.996353984 | 0.240908995 |
| 0.160722002 | 0.832893014 | 0.139575005 |
| 0.153871998 | 0.841077983 | 0.361981004 |
| 0.670261979 | 0.666599989 | 0.026611000 |
| 0.334760994 | 0.002198000 | 0.242081001 |
| 0.493443012 | 0.832791984 | 0.138808995 |
| 0.479847997 | 0.839399993 | 0.367911994 |
| 0.998220980 | 0.667864025 | 0.025645999 |
| 0.664337993 | 0.001877000 | 0.245938003 |
| 0.830614984 | 0.833140016 | 0.142699003 |
| 0.843289971 | 0.843815029 | 0.363368988 |
| 0.532238007 | 0.482098997 | 0.379909992 |
| 0.825201988 | 0.512214005 | 0.378870010 |
| 0.477394015 | 0.167830005 | 0.378834993 |
| 0.347775996 | 0.658315003 | 0.359717995 |
| 0.997501016 | 0.333404005 | 0.137895003 |
| 0.996037006 | 0.330745995 | 0.375512004 |
| 0.165637001 | 0.164704993 | 0.022304000 |
| 0.165384993 | 0.169138998 | 0.255739003 |
| 0.333359003 | 0.332682014 | 0.137406006 |
| 0.321498007 | 0.361472994 | 0.388348013 |
| 0.499599010 | 0.164767995 | 0.020637000 |
| 0.496749997 | 0.167705998 | 0.253919005 |
| 0.664162993 | 0.332439989 | 0.136953995 |
| 0.697947979 | 0.309338987 | 0.395166010 |
| 0.831743002 | 0.165101007 | 0.021203000 |
| 0.834053993 | 0.166628003 | 0.255602002 |
| 0.001201000 | 0.666751981 | 0.137529999 |

|             |             |             |
|-------------|-------------|-------------|
| 0.999481022 | 0.676307976 | 0.378555000 |
| 0.165089995 | 0.498522997 | 0.022430999 |
| 0.166547999 | 0.496302009 | 0.255843997 |
| 0.334632009 | 0.664844990 | 0.137391999 |
| 0.499273986 | 0.497752994 | 0.020771001 |
| 0.507185996 | 0.493743986 | 0.257212996 |
| 0.668404996 | 0.666674972 | 0.137399003 |
| 0.654972017 | 0.687918007 | 0.387403995 |
| 0.831071973 | 0.497350991 | 0.021271000 |
| 0.831339002 | 0.502121985 | 0.255741000 |
| 0.000246000 | 0.998652995 | 0.137562007 |
| 0.000544000 | 0.995905995 | 0.370660007 |
| 0.166215003 | 0.831377029 | 0.021697000 |
| 0.163059995 | 0.835058987 | 0.252099991 |
| 0.334217012 | 0.000685000 | 0.137204006 |
| 0.315176010 | 0.990350008 | 0.374386996 |
| 0.500261009 | 0.830857992 | 0.021516001 |
| 0.501465023 | 0.834789991 | 0.254736006 |
| 0.667577028 | 0.998687983 | 0.137248993 |
| 0.675152004 | 0.008275000 | 0.375611007 |
| 0.832889020 | 0.831416011 | 0.019479999 |
| 0.831268013 | 0.833796024 | 0.253901005 |

## Part II Complementary results

Fig. S1

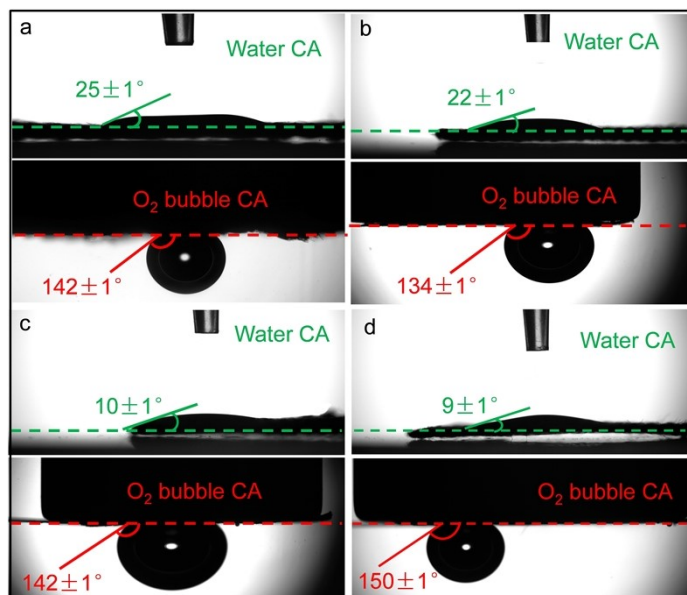

**Fig. S1** Water droplet (top) and O<sub>2</sub> bubble (bottom) CAs of (a) S-NiO/CC, (b) S,P-NiO/CC,(c) S-NiO(Fe)/CC, (d) S,P-NiO(Fe)/CC (Measured by three parallel trials, and the CAs were the average value including deviation).

Fig. S2

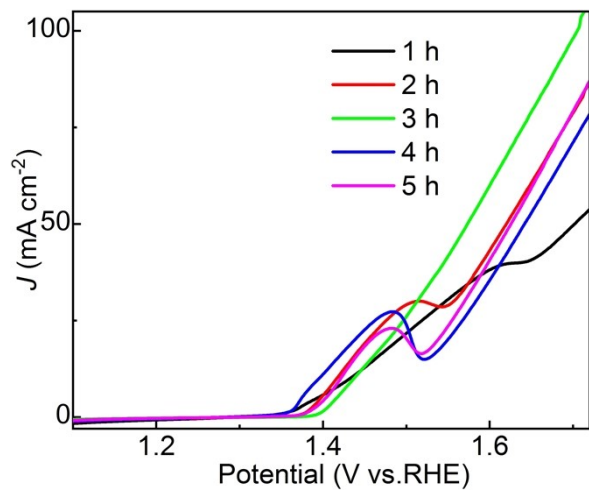

**Fig. S2** The LSV of S,P-NiO(Fe)/CC electrodes prepared at different impregnation time in 0.1 M Fe(NO<sub>3</sub>)<sub>3</sub> solution.

**Fig. S3**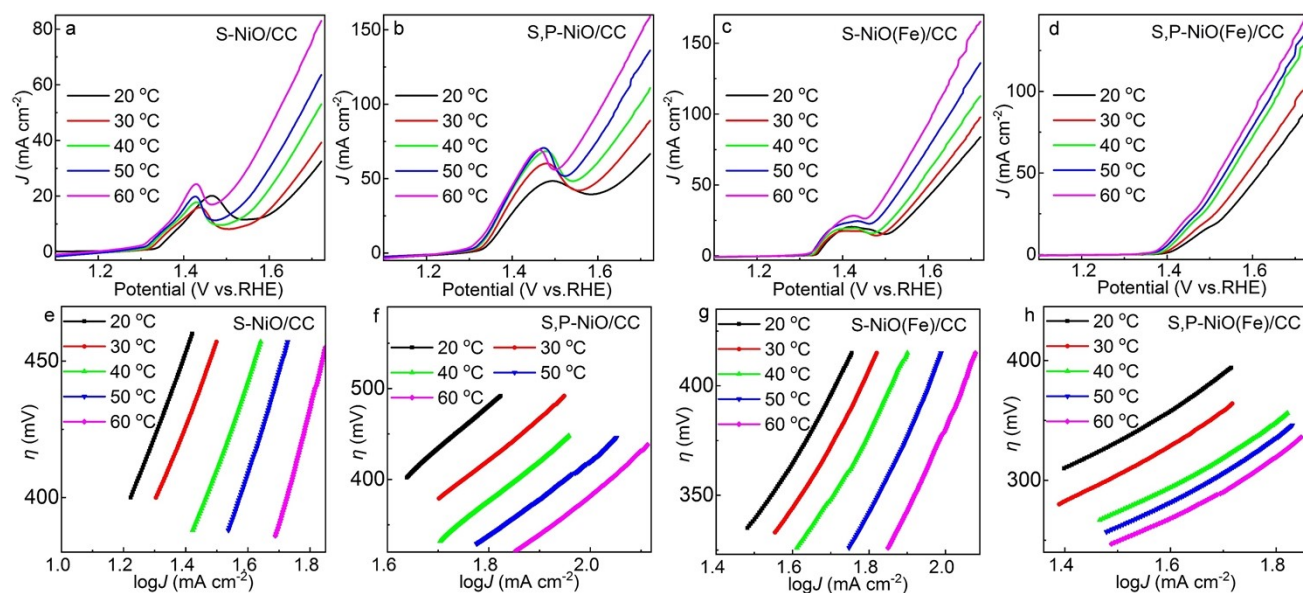

**Fig. S3** (a~d) LSVs at 5 mV s<sup>-1</sup> and (e~h) Tafel slopes of (a,e) S-NiO/CC, (b,f) S,P-NiO/CC, (c,g) S-NiO(Fe)/CC and (d,h) S,P-NiO(Fe)/CC electrodes at different temperatures in 1.0 M KOH.

**Fig. S4**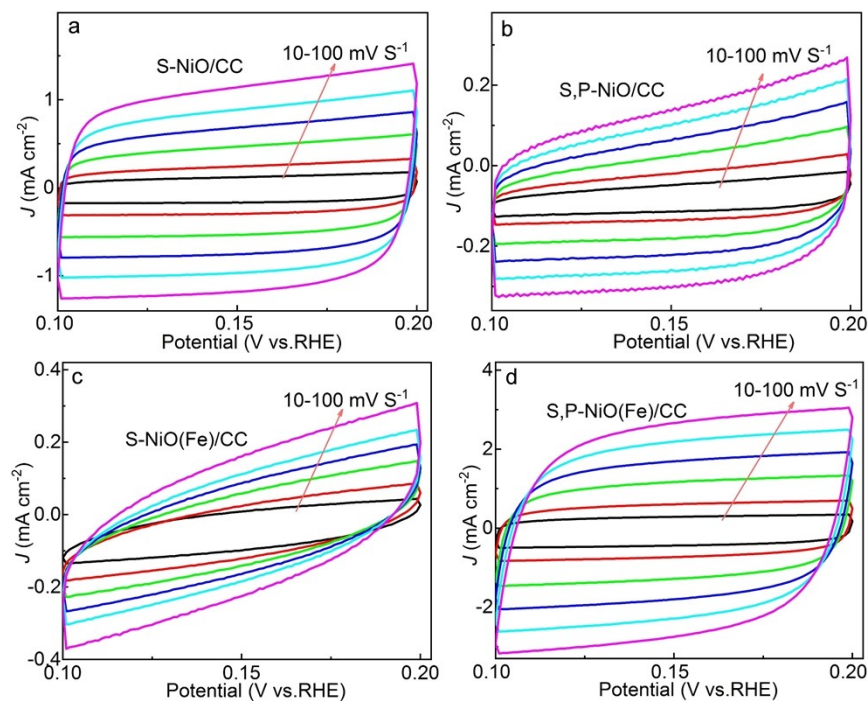

**Fig. S4** CV curves of (a) S-NiO/CC, (b) S/P-NiO/CC, (c) S-NiO(Fe)/CC and (d) S/P-NiO(Fe)/CC in non-faradaic region at scan rates of 10~100 mV s<sup>-1</sup> in 1 M KOH.

**Fig. S5**

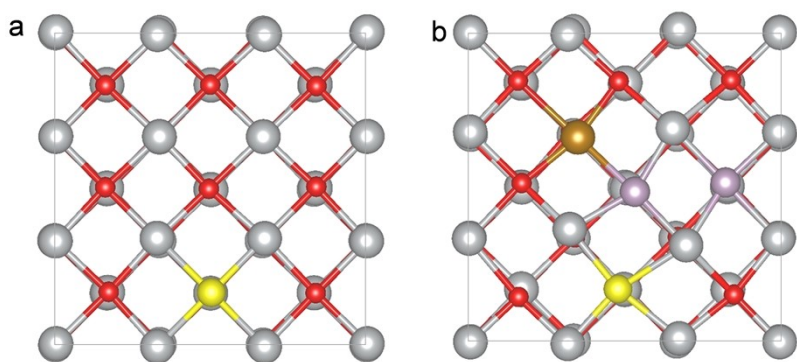

**Fig. S5** The optimized crystal structures of (a) S-NiO/CC and (b) S/P-NiO (Fe)/CC.

**Fig. S6**

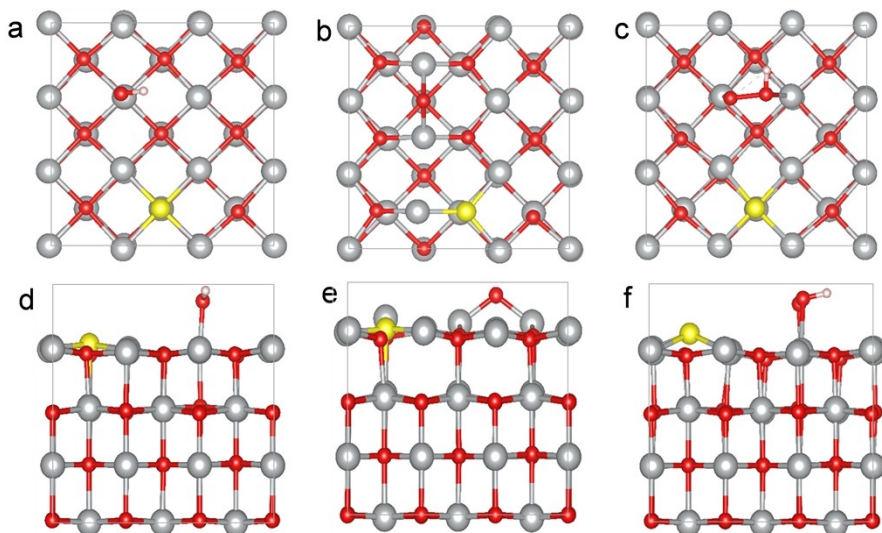

**Fig. S6** The optimized structures of S-NiO/CC models for  $*OH$ ,  $*O$ , and  $*OOH$  adsorption.

Fig. S7

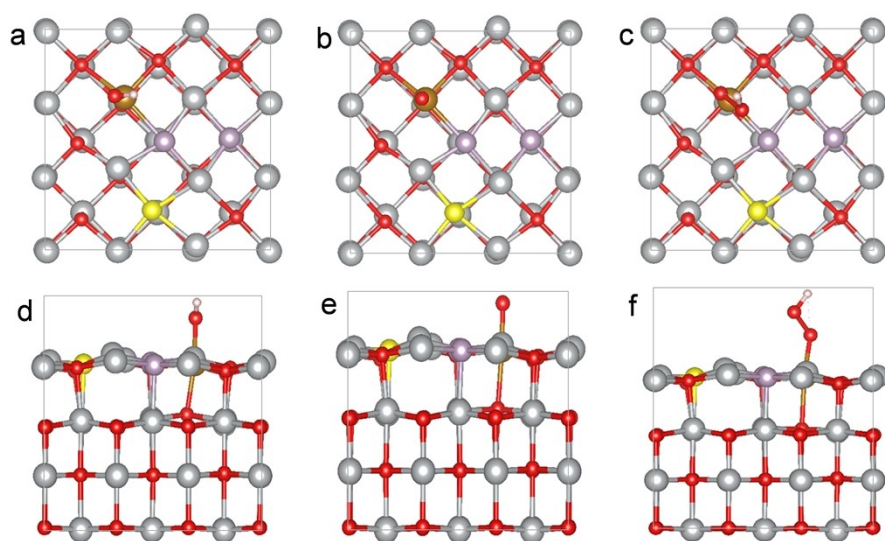

Fig. S7 The optimized structures of S,P-NiO(Fe)/CC models for \*OH, \*O, and \*OOH adsorption.

Fig. S8

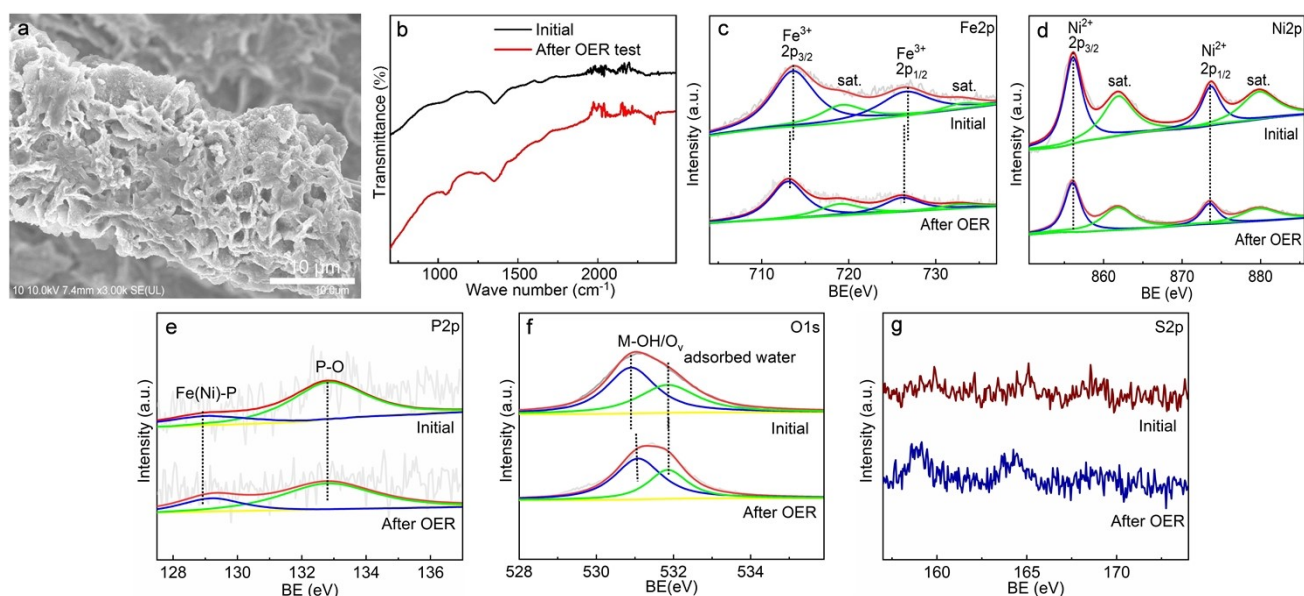

Fig. S8 Post *V-t* (a) SEM, (b) FTIR, (c~g) Fe2p, Ni2p, P2p, O1s and S2p XPS of S/P-NiO(Fe)/CC.

From Fig. S8a, the post *V-t* SEM of S/P-NiO(Fe)/CC exhibits fused flakes and nanoparticles with rough surface, which resembles to its initial morphology, showing the morphological stability undergoes long-term OER operation. In addition, the bending vibration of surface -OH groups at 1354  $\text{cm}^{-1}$  maintains unvaried from FTIR (Fig. S8b), also roughly evidencing the unvaried chemical composition of S,P-NiO(Fe)/CC at high potential. The post *V-t* XPS (Figs. S8 c~g) reveal that the BEs of Fe2p<sub>3/2</sub>, Fe2p<sub>1/2</sub> spin orbitals downshift faintly, while the BEs of Ni2p spin orbitals maintain



unvaried, these outcomes evidence the oxidation values of metal elements are rather stable. From these characterizations, the stable structure of S,P-NiO(Fe)/CC contributes partially to the long-term durabilities for OER and water electrolysis.
